# Supplementary material for: Knowledge, perceptions, and practices of dental professionals and students regarding obturation in endodontic procedures: a nationwide cross-sectional survey
Source: PeerJ. 2025 Jun 3;13:e19455. doi: 10.7717/peerj.19455 (PMC12143286; doi:10.7717/peerj.19455)
Supplement: Supplemental Information 1 [file peerj-13-19455-s001.xlsx]

## Sheet: Sheet1
Demographic Characteristics			Knowledge Section											Attitude Section										Practice Section
Sr.No	Gender	Age	Current academic position	what is the primary purpose of root canal Obturation?	When to obturate the root canal?	Which material is commonly used for obturation in endodontics?	What are the ideal properties of an Obturating matrial?	What is the purpose of using Endodontic sealer in obturation ?	What are the different techniques of Obturation are you aware of?	How does Obturation contribute to the success of root canal treatment?	What are the potential complications associated with inadequate Obturation?	Which form of gutta percha cone you used in clinics?	Which method do you use to disinfect gutta percha cone?	How confident do you feel about your knowledge and skills in root canal Obturation?	How important do you consider obturation to be in the overall success of root canal treatment?	Are you open to adopting new obturation techniques or materials in your practice?	How often do you attend continuing education courses or workshops related to root canal obturation?	How willing are you to invest in new obturation materials or equipment for your practice?	Do you believe that advancements in obturation techniques have improved the success rates of root canal treatment?	How comfortable are you in handling complex root canal anatomy during obturation procedures?	Are you satisfied with the current obturation materials available in the market?	Do you believe that obturation techniques should be standardized for better consistency and outcomes?	How confident are you in educating your patients about the importance of obturation in root canal treatment?	Which obturation technique do you primarily use in your daily practice?	Do you routinely use a rubber dam during obturation procedures?	How often do you encounter difficulties in achieving a satisfactory obturation in root canal treatments?	Are you satisfied with the current obturation techniques you use in terms of efficiency and predictability?	How often do you evaluate the quality of your obturations using radiographs or other imaging techniques?	Do you document the obturation technique and materials used in patient records?	How frequently do you perform retreatment procedures for failed root canal obturations?	How often do you use bio ceramic sealers in your obturation procedures?	Do you actively seek feedback from patients regarding their experience with root canal obturation?	How often do you update your knowledge and skills in modern root canal obturation techniques?
1	2	22	5	3	4	3	4	5	9	5	5	2	2	3	1	2	4	2	2	3	2	2	3	1	4	2	2	2	4	3	4	2	3
2	2	23	5	3	4	3	4	5	9	5	5	2	2	3	1	1	2	2	2	3	2	1	2	1	3	3	3	1	2	2	4	2	3			Gender
3	1	24	5	3	4	3	4	5	9	5	5	3	2	2	1	2	1	2	1	3	1	1	1	1	4	2	1	1	2	2	4	1	1			Age
4	2	23	5	3	4	3	4	3	9	1	5	1	2	3	1	1	3	2	1	3	2	1	2	1	3	2	2	2	2	2	2	2	2			Current academic position
5	1	24	5	1	4	3	4	3	9	1	5	1	2	2	1	3	2	2	1	2	3	1	1	1	3	1	3	1	1	2	2	2	1			what is the primary purpose of root canal Obturation?
6	2	28	5	3	4	3	4	3	9	5	5	1	2	1	1	1	1	1	1	1	2	1	1	1	2	1	1	1	2	2	2	1	2			When to obturate the root canal?
7	2	22	5	3	2	3	4	2	9	1	5	1	2	2	2	1	3	2	2	3	3	1	2	1	3	3	2	1	2	1	4	1	3			Which material is commonly used for obturation in endodontics?
8	2	23	5	3	4	3	4	3	9	1	5	2	4	2	1	2	2	2	1	3	2	1	1	1	4	2	3	1	3	2	4	2	2			What are the ideal properties of an Obturating matrial?
9	2	25	5	3	4	3	4	2	9	1	5	1	3	3	1	1	3	2	1	2	2	2	2	1	3	3	2	2	2	2	2	2	2			What is the purpose of using Endodontic sealer in obturation ?
10	1	22	4	3	2	3	4	3	1	4	5	2	2	1	2	2	1	2	2	1	1	1	2	1	2	2	2	1	1	3	2	1	1			What are the different techniques of Obturation are you aware of?
11	1	25	8	3	4	3	4	3	9	1	5	2	2	3	1	1	4	2	2	4	2	1	2	3	4	3	2	2	2	2	4	3	3			How does Obturation contribute to the success of root canal treatment?
12	2	23	5	3	1	3	4	3	9	1	5	1	3	3	2	3	3	4	2	3	2	1	2	1	4	2	1	1	3	2	2	1	3			What are the potential complications associated with inadequate Obturation?
13	2	23	5	3	4	3	4	5	9	5	5	2	2	3	1	2	3	2	2	3	2	1	2	1	4	2	2	1	4	1	4	2	3			Which form of gutta percha cone you used in clinics?
14	2	22	4	3	1	3	4	3	9	1	5	1	2	3	2	2	3	2	2	4	2	2	2	1	4	2	2	2	2	2	2	2	2			Which method do you use to disinfect gutta percha cone?
15	2	23	4	3	4	3	4	3	9	5	5	1	2	2	1	1	2	2	1	2	2	1	2	2	2	2	2	2	2	2	2	2	2			How confident do you feel about your knowledge and skills in root canal Obturation?
16	2	23	5	3	1	3	4	5	9	1	5	1	2	2	1	1	1	1	1	2	2	1	2	1	4	2	2	2	2	2	4	1	1			How important do you consider obturation to be in the overall success of root canal treatment?
17	2	29	8	3	4	3	4	3	9	5	5	3	2	1	1	1	2	2	1	2	1	1	1	1	4	1	1	1	1	1	2	1	1			Are you open to adopting new obturation techniques or materials in your practice?
18	2	24	5	3	4	3	4	5	9	1	5	2	2	2	1	2	2	2	2	2	2	2	2	1	3	3	2	1	3	2	4	2	2			How often do you attend continuing education courses or workshops related to root canal obturation?
19	2	21	4	3	4	3	4	3	9	1	5	1	2	3	2	1	3	2	2	2	2	2	2	1	3	2	2	2	2	2	2	2	2			How willing are you to invest in new obturation materials or equipment for your practice?
20	2	27	6	3	1	3	4	3	9	1	5	2	2	2	1	1	2	1	1	2	2	2	2	1	3	2	2	1	1	2	3	3	1			Do you believe that advancements in obturation techniques have improved the success rates of root canal treatment?
21	2	23	5	3	4	3	4	5	9	5	5	4	1	3	1	2	4	2	2	3	2	2	2	2	3	2	2	2	1	2	3	2	2			How comfortable are you in handling complex root canal anatomy during obturation procedures?
22	2	24	5	1	4	3	4	3	9	1	5	2	2	2	1	1	1	2	2	3	3	3	2	1	3	1	3	1	2	1	4	1	2			Are you satisfied with the current obturation materials available in the market?
23	2	23	5	1	1	3	4	1	9	5	5	4	2	2	2	2	2	2	2	3	2	2	2	1	3	2	2	1	1	1	3	2	1			Do you believe that obturation techniques should be standardized for better consistency and outcomes?
24	2	23	5	3	4	3	4	3	9	1	5	2	2	2	1	1	1	3	2	2	3	3	1	1	4	2	3	2	2	1	4	2	2			How confident are you in educating your patients about the importance of obturation in root canal treatment?
25	2	23	5	3	4	3	4	3	9	1	5	2	2	2	1	1	3	2	1	3	3	2	2	1	4	2	2	2	1	1	4	2	2			Which obturation technique do you primarily use in your daily practice?
26	2	24	5	3	4	3	4	3	9	1	5	4	2	3	1	1	4	1	1	4	2	1	1	2	4	2	2	1	1	2	3	2	1			Do you routinely use a rubber dam during obturation procedures?
27	2	23	5	3	4	3	4	3	9	1	5	2	2	3	2	1	4	2	2	3	2	2	2	1	4	2	2	1	1	1	4	3	2			How often do you encounter difficulties in achieving a satisfactory obturation in root canal treatments?
28	2	27	8	3	1	3	4	3	9	1	5	4	2	1	1	1	2	2	1	2	2	2	1	3	2	2	2	1	2	2	2	1	2			Are you satisfied with the current obturation techniques you use in terms of efficiency and predictability?
29	2	25	8	2	4	3	4	5	9	1	5	4	3	2	1	1	2	1	2	3	1	2	1	2	4	3	2	2	1	2	3	1	2			How often do you evaluate the quality of your obturations using radiographs or other imaging techniques?
30	2	23	5	3	2	3	4	3	9	1	5	2	2	2	1	2	3	2	1	3	3	2	1	1	4	2	3	1	1	1	4	2	1			Do you document the obturation technique and materials used in patient records?
31	2	23	5	3	2	3	4	3	9	1	3	3	3	2	1	1	1	2	2	2	2	2	2	1	2	2	2	1	1	2	2	1	2			How frequently do you perform retreatment procedures for failed root canal obturations?
32	2	27	6	3	2	3	4	3	9	1	5	2	2	1	1	1	3	2	1	2	1	1	1	1	1	2	1	2	1	2	3	1	1			How often do you use bio ceramic sealers in your obturation procedures?
33	2	23	5	1	4	3	4	5	9	1	5	2	1	2	2	2	3	2	1	3	3	1	2	1	4	2	2	1	2	1	4	2	2			Do you actively seek feedback from patients regarding their experience with root canal obturation?
34	2	23	5	1	2	3	4	5	9	1	5	2	2	3	1	2	3	2	1	3	2	2	1	1	3	3	3	2	3	2	4	2	2			How often do you update your knowledge and skills in modern root canal obturation techniques?
35	2	39	8	3	2	3	4	2	1	1	3	3	3	2	1	1	2	2	1	2	1	1	1	1	3	2	2	2	2	2	2	2	2
36	2	24	8	3	4	3	4	3	9	1	5	1	2	2	1	2	3	2	2	2	1	2	1	1	4	2	2	1	1	1	4	3	3
37	2	24	8	3	4	3	4	3	9	1	5	2	2	2	1	2	2	2	2	3	2	1	2	1	2	3	2	1	1	2	4	1	2
38	2	23	5	3	4	3	4	5	9	1	5	2	2	2	1	1	4	2	1	2	2	1	1	1	2	3	2	2	2	2	2	1	3
39	2	23	5	3	3	3	4	3	1	1	5	1	3	3	1	1	4	1	1	3	2	1	2	1	3	1	3	1	1	2	2	1	1
40	2	23	5	3	2	3	4	3	9	1	5	4	2	3	1	1	4	2	1	3	2	2	2	1	4	2	3	2	3	2	4	3	3
41	2	26	6	3	4	3	4	5	9	1	5	4	2	2	2	1	1	2	1	3	1	2	1	3	3	2	2	1	3	1	2	2	1
42	2	23	5	3	3	3	4	2	1	1	5	2	2	2	1	1	1	1	1	2	3	1	1	1	4	2	2	2	1	2	1	1	2
43	1	24	6	3	2	3	4	3	9	1	5	1	2	2	1	1	3	2	2	2	2	2	2	1	3	2	2	1	2	2	3	2	2
44	1	24	5	3	3	3	4	5	9	3	5	4	3	2	2	1	1	1	1	1	1	1	1	3	4	4	1	1	1	1	1	1	1
45	2	23	5	3	4	3	2	3	9	5	5	2	2	2	1	1	4	2	2	2	2	2	2	3	3	2	2	2	3	2	4	2	3
46	2	24	8	3	2	3	4	3	1	3	5	1	3	2	1	1	3	1	2	2	1	2	2	3	3	2	1	1	2	1	2	2	2
47	1	23	8	3	4	3	4	3	9	1	5	4	2	2	2	1	1	2	1	2	2	1	1	3	3	1	2	1	2	1	2	1	1
48	2	23	5	3	4	3	4	5	9	1	5	4	2	2	1	2	1	1	1	2	1	1	1	1	2	1	2	1	1	2	1	1	1
49	2	29	6	3	4	3	4	5	9	5	5	2	1	2	1	2	2	2	2	2	1	1	2	4	3	2	2	2	1	2	3	2	2
50	2	23	8	3	4	3	4	3	9	1	5	1	2	2	1	1	1	1	2	3	2	1	2	3	3	2	2	1	1	1	4	2	1
51	1	25	8	3	4	3	4	5	9	5	5	4	2	2	2	1	1	2	3	3	1	2	2	1	3	2	2	3	3	1	4	1	2
52	1	23	5	3	3	3	4	1	1	1	5	1	1	3	3	2	2	3	2	3	2	1	1	1	3	2	3	2	3	2	4	1	1
53	1	23	5	3	3	3	2	3	9	2	5	2	2	2	3	3	3	2	2	2	2	2	2	1	2	2	2	2	2	2	1	4	1
54	2	23	5	3	4	3	4	5	9	5	5	1	3	3	1	1	2	1	1	3	2	1	2	1	4	2	2	1	3	2	3	3	3
55	1	28	8	3	4	3	4	3	9	1	5	4	2	2	1	1	3	2	1	2	2	2	1	3	4	1	2	1	4	1	4	1	2
56	1	27	6	3	4	3	4	3	9	1	5	3	2	2	1	2	2	2	2	2	2	2	2	1	3	2	2	1	2	2	3	2	2
57	2	22	5	1	4	4	4	3	9	1	5	2	1	2	1	2	3	3	1	2	2	2	2	1	4	2	2	2	2	2	2	2	2
58	2	25	8	3	4	3	4	3	9	1	5	2	2	2	1	1	2	2	1	2	1	1	1	1	3	2	2	1	3	2	1	2	2
59	1	23	3	1	4	3	4	3	9	5	5	2	2	2	1	2	2	2	1	2	2	2	3	3	3	2	2	1	3	3	3	3	2
60	2	22	4	3	4	3	4	3	9	1	5	1	2	3	1	1	3	2	2	4	2	2	2	1	4	3	2	1	2	1	4	1	2
61	2	22	5	3	4	3	4	1	9	4	5	2	2	2	1	1	4	3	1	2	2	2	2	1	4	2	2	1	2	2	4	2	1
62	2	25	6	3	4	3	4	5	9	5	5	2	2	2	1	2	2	2	1	2	2	1	2	1	2	2	2	2	2	2	1	2	2
63	2	22	5	3	4	3	4	5	9	1	5	2	2	2	1	2	2	2	1	3	1	1	2	1	3	2	1	1	3	2	4	2	2
64	1	30	7	4	4	3	4	5	9	4	5	4	2	2	2	2	2	1	2	2	3	2	1	3	3	2	2	1	1	3	1	1	1
65	1	23	5	3	4	3	4	3	9	5	5	2	2	2	2	2	2	2	1	1	2	1	2	1	3	2	2	1	1	2	4	2	2
66	2	25	6	3	4	3	4	3	9	1	5	1	2	2	1	1	2	2	1	2	2	1	2	1	1	2	1	1	2	4	3	1	1
67	2	25	6	3	4	3	4	5	9	1	5	2	2	2	1	2	1	2	2	2	2	1	1	3	4	2	2	1	4	1	4	2	2
68	1	26	6	3	4	3	4	5	9	5	5	2	2	1	1	1	1	1	1	1	2	1	1	3	3	1	1	1	2	3	1	1	1
69	1	25	5	3	4	3	4	5	9	5	5	2	4	4	1	2	2	2	2	2	2	1	2	3	2	3	3	2	2	2	2	2	2
70	2	23	8	3	4	3	4	3	9	1	5	4	3	2	1	1	2	2	1	2	1	1	2	1	3	1	2	1	3	1	2	3	1
71	2	29	7	3	2	3	4	3	9	1	5	1	2	1	1	1	2	2	1	1	1	2	1	3	3	1	2	1	2	2	2	1	2
72	1	23	4	3	4	3	4	3	9	5	5	2	2	3	4	1	2	2	1	3	3	1	3	1	3	3	3	3	3	2	4	1	2
73	1	22	4	3	2	3	4	3	9	1	5	2	3	3	1	2	3	2	2	3	2	2	1	1	3	2	2	1	2	1	4	1	2
74	1	24	4	3	2	3	4	3	9	1	5	2	3	3	1	2	3	2	2	3	2	2	1	1	3	2	2	1	1	1	4	1	2
75	1	26	6	3	3	3	4	3	9	1	5	1	2	2	1	1	3	2	1	2	2	1	1	1	2	2	2	2	2	1	3	2	2
76	2	22	5	3	3	3	4	3	1	1	5	2	3	2	1	1	3	2	1	2	2	1	1	3	4	2	2	1	2	1	4	1	2
77	2	22	4	3	4	3	4	3	9	1	5	1	2	2	1	1	2	1	1	4	2	1	3	1	3	3	3	2	2	2	2	1	1
78	2	23	5	3	4	3	4	5	9	5	5	2	2	3	1	1	3	3	1	3	2	1	3	1	3	3	3	3	1	2	3	3	2
79	2	29	8	3	4	3	4	5	9	1	5	1	2	2	1	1	1	2	2	2	3	1	2	1	4	1	2	1	3	2	4	1	2
80	1	40	8	3	2	3	4	3	9	1	5	2	2	1	1	2	1	2	1	2	2	2	2	1	4	1	2	2	3	2	1	1	1
81	2	24	5	3	2	3	4	3	2	1	5	1	2	2	1	1	1	1	2	3	1	1	1	1	1	1	1	1	2	2	3	3	3
82	2	23	8	3	4	3	4	3	9	1	5	4	3	2	1	1	2	2	1	2	1	1	2	1	3	1	2	1	3	1	2	3	1
83	2	29	7	3	2	3	4	3	9	1	5	1	2	1	1	1	2	2	1	1	1	2	1	3	3	1	2	1	2	2	2	1	2
84	1	23	4	3	4	3	4	3	9	5	5	2	2	3	4	1	2	2	1	3	3	1	3	1	3	3	3	3	3	2	4	1	2
85	1	22	4	3	2	3	4	3	9	1	5	2	3	3	1	2	3	2	2	3	2	2	1	1	3	2	2	1	2	1	4	1	2
86	1	24	4	3	2	3	4	3	9	1	5	2	3	3	1	2	3	2	2	3	2	2	1	1	3	2	2	1	1	1	4	1	2
87	1	26	6	3	3	3	4	3	9	1	5	1	2	2	1	1	3	2	1	2	2	1	1	1	2	2	2	2	2	1	3	2	2
88	2	22	5	3	3	3	4	3	1	1	5	2	3	2	1	1	3	2	1	2	2	1	1	3	4	2	2	1	2	1	4	1	2
89	2	22	4	3	4	3	4	3	9	1	5	1	2	2	1	1	2	1	1	4	2	1	3	1	3	3	3	2	2	2	2	1	1
90	2	23	5	3	4	3	4	5	9	5	5	2	2	3	1	1	3	3	1	3	2	1	3	1	3	3	3	3	1	2	3	3	2
91	2	23	8	3	4	3	4	3	9	1	5	4	3	2	1	1	2	2	1	2	1	1	2	1	3	1	2	1	3	1	2	3	1
92	2	29	7	3	2	3	4	3	9	1	5	1	2	1	1	1	2	2	1	1	1	2	1	3	3	1	2	1	2	2	2	1	2
93	1	23	4	3	4	3	4	3	9	5	5	2	2	3	4	1	2	2	1	3	3	1	3	1	3	3	3	3	3	2	4	1	2
94	1	22	4	3	2	3	4	3	9	1	5	2	3	3	1	2	3	2	2	3	2	2	1	1	3	2	2	1	2	1	4	1	2
95	1	24	4	3	2	3	4	3	9	1	5	2	3	3	1	2	3	2	2	3	2	2	1	1	3	2	2	1	1	1	4	1	2
96	1	26	6	3	3	3	4	3	9	1	5	1	2	2	1	1	3	2	1	2	2	1	1	1	2	2	2	2	2	1	3	2	2
97	2	22	5	3	3	3	4	3	1	1	5	2	3	2	1	1	3	2	1	2	2	1	1	3	4	2	2	1	2	1	4	1	2
98	2	22	4	3	4	3	4	3	9	1	5	1	2	2	1	1	2	1	1	4	2	1	3	1	3	3	3	2	2	2	2	1	1
99	2	23	5	3	4	3	4	5	9	5	5	2	2	3	1	1	3	3	1	3	2	1	3	1	3	3	3	3	1	2	3	3	2
100	2	29	8	3	4	3	4	5	9	1	5	1	2	2	1	1	1	2	2	2	3	1	2	1	4	1	2	1	3	2	4	1	2
101	1	40	8	3	2	3	4	3	9	1	5	2	2	1	1	2	1	2	1	2	2	2	2	1	4	1	2	2	3	2	1	1	1
102	2	24	5	3	2	3	4	3	2	1	5	1	2	2	1	1	1	1	2	3	1	1	1	1	1	1	1	1	2	2	3	3	3
103	2	23	8	3	4	3	4	3	9	1	5	4	3	2	1	1	2	2	1	2	1	1	2	1	3	1	2	1	3	1	2	3	1
104	2	29	7	3	2	3	4	3	9	1	5	1	2	1	1	1	2	2	1	1	1	2	1	3	3	1	2	1	2	2	2	1	2
105	1	23	4	3	4	3	4	3	9	5	5	2	2	3	4	1	2	2	1	3	3	1	3	1	3	3	3	3	3	2	4	1	2
106	1	22	4	3	2	3	4	3	9	1	5	2	3	3	1	2	3	2	2	3	2	2	1	1	3	2	2	1	2	1	4	1	2
107	1	24	4	3	2	3	4	3	9	1	5	2	3	3	1	2	3	2	2	3	2	2	1	1	3	2	2	1	1	1	4	1	2
108	1	26	6	3	3	3	4	3	9	1	5	1	2	2	1	1	3	2	1	2	2	1	1	1	2	2	2	2	2	1	3	2	2
109	2	22	5	3	3	3	4	3	1	1	5	2	3	2	1	1	3	2	1	2	2	1	1	3	4	2	2	1	2	1	4	1	2
110	2	22	4	3	4	3	4	3	9	1	5	1	2	2	1	1	2	1	1	4	2	1	3	1	3	3	3	2	2	2	2	1	1
111	2	23	5	3	4	3	4	5	9	5	5	2	2	3	1	1	3	3	1	3	2	1	3	1	3	3	3	3	1	2	3	3	2
112	2	23	5	3	4	3	4	5	9	5	5	2	2	3	1	1	3	3	1	3	2	1	3	1	3	3	3	3	1	2	3	3	2
113	2	29	8	3	4	3	4	5	9	1	5	1	2	2	1	1	1	2	2	2	3	1	2	1	4	1	2	1	3	2	4	1	2
114	1	40	8	3	2	3	4	3	9	1	5	2	2	1	1	2	1	2	1	2	2	2	2	1	4	1	2	2	3	2	1	1	1
115	2	24	5	3	2	3	4	3	2	1	5	1	2	2	1	1	1	1	2	3	1	1	1	1	1	1	1	1	2	2	3	3	3
116	2	23	8	3	4	3	4	3	9	1	5	4	3	2	1	1	2	2	1	2	1	1	2	1	3	1	2	1	3	1	2	3	1
117	2	29	7	3	2	3	4	3	9	1	5	1	2	1	1	1	2	2	1	1	1	2	1	3	3	1	2	1	2	2	2	1	2
118	1	23	4	3	4	3	4	3	9	5	5	2	2	3	4	1	2	2	1	3	3	1	3	1	3	3	3	3	3	2	4	1	2
119	1	22	4	3	2	3	4	3	9	1	5	2	3	3	1	2	3	2	2	3	2	2	1	1	3	2	2	1	2	1	4	1	2
120	1	24	4	3	2	3	4	3	9	1	5	2	3	3	1	2	3	2	2	3	2	2	1	1	3	2	2	1	1	1	4	1	2
121	1	26	6	3	3	3	4	3	9	1	5	1	2	2	1	1	3	2	1	2	2	1	1	1	2	2	2	2	2	1	3	2	2
122	2	22	5	3	3	3	4	3	1	1	5	2	3	2	1	1	3	2	1	2	2	1	1	3	4	2	2	1	2	1	4	1	2
123	2	22	4	3	4	3	4	3	9	1	5	1	2	2	1	1	2	1	1	4	2	1	3	1	3	3	3	2	2	2	2	1	1
124	2	23	5	3	4	3	4	5	9	5	5	2	2	3	1	1	3	3	1	3	2	1	3	1	3	3	3	3	1	2	3	3	2
125	2	23	8	3	4	3	4	3	9	1	5	4	3	2	1	1	2	2	1	2	1	1	2	1	3	1	2	1	3	1	2	3	1
126	2	29	7	3	2	3	4	3	9	1	5	1	2	1	1	1	2	2	1	1	1	2	1	3	3	1	2	1	2	2	2	1	2
127	1	23	4	3	4	3	4	3	9	5	5	2	2	3	4	1	2	2	1	3	3	1	3	1	3	3	3	3	3	2	4	1	2
128	1	22	4	3	2	3	4	3	9	1	5	2	3	3	1	2	3	2	2	3	2	2	1	1	3	2	2	1	2	1	4	1	2
129	1	24	4	3	2	3	4	3	9	1	5	2	3	3	1	2	3	2	2	3	2	2	1	1	3	2	2	1	1	1	4	1	2
130	1	26	6	3	3	3	4	3	9	1	5	1	2	2	1	1	3	2	1	2	2	1	1	1	2	2	2	2	2	1	3	2	2
131	2	22	5	3	3	3	4	3	1	1	5	2	3	2	1	1	3	2	1	2	2	1	1	3	4	2	2	1	2	1	4	1	2
132	2	22	4	3	4	3	4	3	9	1	5	1	2	2	1	1	2	1	1	4	2	1	3	1	3	3	3	2	2	2	2	1	1
133	2	23	5	3	4	3	4	5	9	5	5	2	2	3	1	1	3	3	1	3	2	1	3	1	3	3	3	3	1	2	3	3	2
134	2	29	8	3	4	3	4	5	9	1	5	1	2	2	1	1	1	2	2	2	3	1	2	1	4	1	2	1	3	2	4	1	2
135	1	40	8	3	2	3	4	3	9	1	5	2	2	1	1	2	1	2	1	2	2	2	2	1	4	1	2	2	3	2	1	1	1
136	2	24	5	3	2	3	4	3	2	1	5	1	2	2	1	1	1	1	2	3	1	1	1	1	1	1	1	1	2	2	3	3	3
137	2	23	8	3	4	3	4	3	9	1	5	4	3	2	1	1	2	2	1	2	1	1	2	1	3	1	2	1	3	1	2	3	1
138	2	29	7	3	2	3	4	3	9	1	5	1	2	1	1	1	2	2	1	1	1	2	1	3	3	1	2	1	2	2	2	1	2
139	1	23	4	3	4	3	4	3	9	5	5	2	2	3	4	1	2	2	1	3	3	1	3	1	3	3	3	3	3	2	4	1	2
140	1	22	4	3	2	3	4	3	9	1	5	2	3	3	1	2	3	2	2	3	2	2	1	1	3	2	2	1	2	1	4	1	2
141	1	24	4	3	2	3	4	3	9	1	5	2	3	3	1	2	3	2	2	3	2	2	1	1	3	2	2	1	1	1	4	1	2
142	1	26	6	3	3	3	4	3	9	1	5	1	2	2	1	1	3	2	1	2	2	1	1	1	2	2	2	2	2	1	3	2	2
143	2	22	5	3	3	3	4	3	1	1	5	2	3	2	1	1	3	2	1	2	2	1	1	3	4	2	2	1	2	1	4	1	2
144	2	22	4	3	4	3	4	3	9	1	5	1	2	2	1	1	2	1	1	4	2	1	3	1	3	3	3	2	2	2	2	1	1
145	2	27	6	3	1	3	4	3	9	1	5	2	2	2	1	1	2	1	1	2	2	2	2	1	3	2	2	1	1	2	3	3	1
146	2	23	5	3	4	3	4	5	9	5	5	4	1	3	1	2	4	2	2	3	2	2	2	2	3	2	2	2	1	2	3	2	2
147	2	24	5	1	4	3	4	3	9	1	5	2	2	2	1	1	1	2	2	3	3	3	2	1	3	1	3	1	2	1	4	1	2
148	2	23	5	1	1	3	4	1	9	5	5	4	2	2	2	2	2	2	2	3	2	2	2	1	3	2	2	1	1	1	3	2	1
149	2	23	5	3	4	3	4	3	9	1	5	2	2	2	1	1	1	3	2	2	3	3	1	1	4	2	3	2	2	1	4	2	2
150	2	23	5	3	4	3	4	3	9	1	5	2	2	2	1	1	3	2	1	3	3	2	2	1	4	2	2	2	1	1	4	2	2
151	2	24	5	3	4	3	4	3	9	1	5	4	2	3	1	1	4	1	1	4	2	1	1	2	4	2	2	1	1	2	3	2	1
152	2	23	5	3	4	3	4	3	9	1	5	2	2	3	2	1	4	2	2	3	2	2	2	1	4	2	2	1	1	1	4	3	2
153	2	27	8	3	1	3	4	3	9	1	5	4	2	1	1	1	2	2	1	2	2	2	1	3	2	2	2	1	2	2	2	1	2
154	2	25	8	2	4	3	4	5	9	1	5	4	3	2	1	1	2	1	2	3	1	2	1	2	4	3	2	2	1	2	3	1	2
155	2	23	5	3	2	3	4	3	9	1	5	2	2	2	1	2	3	2	1	3	3	2	1	1	4	2	3	1	1	1	4	2	1
156	2	23	5	3	2	3	4	3	9	1	3	3	3	2	1	1	1	2	2	2	2	2	2	1	2	2	2	1	1	2	2	1	2
157	2	27	6	3	2	3	4	3	9	1	5	2	2	1	1	1	3	2	1	2	1	1	1	1	1	2	1	2	1	2	3	1	1
158	2	23	5	1	4	3	4	5	9	1	5	2	1	2	2	2	3	2	1	3	3	1	2	1	4	2	2	1	2	1	4	2	2
159	2	23	5	1	2	3	4	5	9	1	5	2	2	3	1	2	3	2	1	3	2	2	1	1	3	3	3	2	3	2	4	2	2
160	2	38	8	3	2	3	4	2	1	1	3	3	3	2	1	1	2	2	1	2	1	1	1	1	3	2	2	2	2	2	2	2	2
161	2	24	8	3	4	3	4	3	9	1	5	1	2	2	1	2	3	2	2	2	1	2	1	1	4	2	2	1	1	1	4	3	3
162	2	24	8	3	4	3	4	3	9	1	5	2	2	2	1	2	2	2	2	3	2	1	2	1	2	3	2	1	1	2	4	1	2
163	2	23	5	3	4	3	4	5	9	1	5	2	2	2	1	1	4	2	1	2	2	1	1	1	2	3	2	2	2	2	2	1	3
164	2	23	5	3	3	3	4	3	1	1	5	1	3	3	1	1	4	1	1	3	2	1	2	1	3	1	3	1	1	2	2	1	1
165	2	23	5	3	2	3	4	3	9	1	5	4	2	3	1	1	4	2	1	3	2	2	2	1	4	2	3	2	3	2	4	3	3
166	2	26	6	3	4	3	4	5	9	1	5	4	2	2	2	1	1	2	1	3	1	2	1	3	3	2	2	1	3	1	2	2	1
167	2	23	5	3	3	3	4	2	1	1	5	2	2	2	1	1	1	1	1	2	3	1	1	1	4	2	2	2	1	2	1	1	2
168	1	24	6	3	2	3	4	3	9	1	5	1	2	2	1	1	3	2	2	2	2	2	2	1	3	2	2	1	2	2	3	2	2
169	1	24	5	3	3	3	4	5	9	3	5	4	3	2	2	1	1	1	1	1	1	1	1	3	4	4	1	1	1	1	1	1	1
170	2	23	5	3	4	3	2	3	9	5	5	2	2	2	1	1	4	2	2	2	2	2	2	3	3	2	2	2	3	2	4	2	3
171	2	24	8	3	2	3	4	3	1	3	5	1	3	2	1	1	3	1	2	2	1	2	2	3	3	2	1	1	2	1	2	2	2
172	1	23	8	3	4	3	4	3	9	1	5	4	2	2	2	1	1	2	1	2	2	1	1	3	3	1	2	1	2	1	2	1	1
173	2	23	5	3	4	3	4	5	9	1	5	4	2	2	1	2	1	1	1	2	1	1	1	1	2	1	2	1	1	2	1	1	1
174	2	29	6	3	4	3	4	5	9	5	5	2	1	2	1	2	2	2	2	2	1	1	2	4	3	2	2	2	1	2	3	2	2
175	2	23	8	3	4	3	4	3	9	1	5	1	2	2	1	1	1	1	2	3	2	1	2	3	3	2	2	1	1	1	4	2	1
176	1	25	8	3	4	3	4	5	9	5	5	4	2	2	2	1	1	2	3	3	1	2	2	1	3	2	2	3	3	1	4	1	2
177	1	23	5	3	3	3	4	1	1	1	5	1	1	3	3	2	2	3	2	3	2	1	1	1	3	2	3	2	3	2	4	1	1
178	1	23	5	3	3	3	2	3	9	2	5	2	2	2	3	3	3	2	2	2	2	2	2	1	2	2	2	2	2	2	1	4	1
179	2	23	5	3	4	3	4	5	9	5	5	1	3	3	1	1	2	1	1	3	2	1	2	1	4	2	2	1	3	2	3	3	3
180	1	28	8	3	4	3	4	3	9	1	5	4	2	2	1	1	3	2	1	2	2	2	1	3	4	1	2	1	4	1	4	1	2
181	1	27	6	3	4	3	4	3	9	1	5	3	2	2	1	2	2	2	2	2	2	2	2	1	3	2	2	1	2	2	3	2	2
182	2	22	5	1	4	4	4	3	9	1	5	2	1	2	1	2	3	3	1	2	2	2	2	1	4	2	2	2	2	2	2	2	2
183	2	25	8	3	4	3	4	3	9	1	5	2	2	2	1	1	2	2	1	2	1	1	1	1	3	2	2	1	3	2	1	2	2
184	1	23	3	1	4	3	4	3	9	5	5	2	2	2	1	2	2	2	1	2	2	2	3	3	3	2	2	1	3	3	3	3	2
185	2	22	4	3	4	3	4	3	9	1	5	1	2	3	1	1	3	2	2	4	2	2	2	1	4	3	2	1	2	1	4	1	2
186	2	22	5	3	4	3	4	1	9	4	5	2	2	2	1	1	4	3	1	2	2	2	2	1	4	2	2	1	2	2	4	2	1
187	2	25	6	3	4	3	4	5	9	5	5	2	2	2	1	2	2	2	1	2	2	1	2	1	2	2	2	2	2	2	1	2	2
188	2	22	5	3	4	3	4	5	9	1	5	2	2	2	1	2	2	2	1	3	1	1	2	1	3	2	1	1	3	2	4	2	2
189	1	30	7	4	4	3	4	5	9	4	5	4	2	2	2	2	2	1	2	2	3	2	1	3	3	2	2	1	1	3	1	1	1
190	1	23	5	3	4	3	4	3	9	5	5	2	2	2	2	2	2	2	1	1	2	1	2	1	3	2	2	1	1	2	4	2	2
191	2	25	6	3	4	3	4	3	9	1	5	1	2	2	1	1	2	2	1	2	2	1	2	1	1	2	1	1	2	4	3	1	1
192	2	25	6	3	4	3	4	5	9	1	5	2	2	2	1	2	1	2	2	2	2	1	1	3	4	2	2	1	4	1	4	2	2
193	1	26	6	3	4	3	4	5	9	5	5	2	2	1	1	1	1	1	1	1	2	1	1	3	3	1	1	1	2	3	1	1	1
194	1	25	5	3	4	3	4	5	9	5	5	2	4	4	1	2	2	2	2	2	2	1	2	3	2	3	3	2	2	2	2	2	2
195	2	23	8	3	4	3	4	3	9	1	5	4	3	2	1	1	2	2	1	2	1	1	2	1	3	1	2	1	3	1	2	3	1
196	2	29	7	3	2	3	4	3	9	1	5	1	2	1	1	1	2	2	1	1	1	2	1	3	3	1	2	1	2	2	2	1	2
197	1	23	4	3	4	3	4	3	9	5	5	2	2	3	4	1	2	2	1	3	3	1	3	1	3	3	3	3	3	2	4	1	2
198	1	22	4	3	2	3	4	3	9	1	5	2	3	3	1	2	3	2	2	3	2	2	1	1	3	2	2	1	2	1	4	1	2
199	1	24	4	3	2	3	4	3	9	1	5	2	3	3	1	2	3	2	2	3	2	2	1	1	3	2	2	1	1	1	4	1	2
200	1	26	6	3	3	3	4	3	9	1	5	1	2	2	1	1	3	2	1	2	2	1	1	1	2	2	2	2	2	1	3	2	2
201	2	22	5	3	3	3	4	3	1	1	5	2	3	2	1	1	3	2	1	2	2	1	1	3	4	2	2	1	2	1	4	1	2
202	2	22	4	3	4	3	4	3	9	1	5	1	2	2	1	1	2	1	1	4	2	1	3	1	3	3	3	2	2	2	2	1	1
203	2	23	5	3	4	3	4	5	9	5	5	2	2	3	1	1	3	3	1	3	2	1	3	1	3	3	3	3	1	2	3	3	2
204	2	29	8	3	4	3	4	5	9	1	5	1	2	2	1	1	1	2	2	2	3	1	2	1	4	1	2	1	3	2	4	1	2
205	1	40	8	3	2	3	4	3	9	1	5	2	2	1	1	2	1	2	1	2	2	2	2	1	4	1	2	2	3	2	1	1	1
206	2	24	5	3	2	3	4	3	2	1	5	1	2	2	1	1	1	1	2	3	1	1	1	1	1	1	1	1	2	2	3	3	3
207	2	23	8	3	4	3	4	3	9	1	5	4	3	2	1	1	2	2	1	2	1	1	2	1	3	1	2	1	3	1	2	3	1
208	2	29	7	3	2	3	4	3	9	1	5	1	2	1	1	1	2	2	1	1	1	2	1	3	3	1	2	1	2	2	2	1	2
209	1	23	4	3	4	3	4	3	9	5	5	2	2	3	4	1	2	2	1	3	3	1	3	1	3	3	3	3	3	2	4	1	2
210	1	22	4	3	2	3	4	3	9	1	5	2	3	3	1	2	3	2	2	3	2	2	1	1	3	2	2	1	2	1	4	1	2
211	1	24	4	3	2	3	4	3	9	1	5	2	3	3	1	2	3	2	2	3	2	2	1	1	3	2	2	1	1	1	4	1	2
212	1	26	6	3	3	3	4	3	9	1	5	1	2	2	1	1	3	2	1	2	2	1	1	1	2	2	2	2	2	1	3	2	2
213	2	22	5	3	3	3	4	3	1	1	5	2	3	2	1	1	3	2	1	2	2	1	1	3	4	2	2	1	2	1	4	1	2
214	2	22	4	3	4	3	4	3	9	1	5	1	2	2	1	1	2	1	1	4	2	1	3	1	3	3	3	2	2	2	2	1	1
215	2	23	5	3	4	3	4	5	9	5	5	2	2	3	1	1	3	3	1	3	2	1	3	1	3	3	3	3	1	2	3	3	2
216	2	23	8	3	4	3	4	3	9	1	5	4	3	2	1	1	2	2	1	2	1	1	2	1	3	1	2	1	3	1	2	3	1
217	2	29	7	3	2	3	4	3	9	1	5	1	2	1	1	1	2	2	1	1	1	2	1	3	3	1	2	1	2	2	2	1	2
218	1	23	4	3	4	3	4	3	9	5	5	2	2	3	4	1	2	2	1	3	3	1	3	1	3	3	3	3	3	2	4	1	2
219	1	22	4	3	2	3	4	3	9	1	5	2	3	3	1	2	3	2	2	3	2	2	1	1	3	2	2	1	2	1	4	1	2
220	1	24	4	3	2	3	4	3	9	1	5	2	3	3	1	2	3	2	2	3	2	2	1	1	3	2	2	1	1	1	4	1	2
221	1	26	6	3	3	3	4	3	9	1	5	1	2	2	1	1	3	2	1	2	2	1	1	1	2	2	2	2	2	1	3	2	2
222	2	22	5	3	3	3	4	3	1	1	5	2	3	2	1	1	3	2	1	2	2	1	1	3	4	2	2	1	2	1	4	1	2
223	2	22	4	3	4	3	4	3	9	1	5	1	2	2	1	1	2	1	1	4	2	1	3	1	3	3	3	2	2	2	2	1	1
224	2	23	5	3	4	3	4	5	9	5	5	2	2	3	1	1	3	3	1	3	2	1	3	1	3	3	3	3	1	2	3	3	2
225	2	29	8	3	4	3	4	5	9	1	5	1	2	2	1	1	1	2	2	2	3	1	2	1	4	1	2	1	3	2	4	1	2
226	1	40	8	3	2	3	4	3	9	1	5	2	2	1	1	2	1	2	1	2	2	2	2	1	4	1	2	2	3	2	1	1	1
227	2	24	5	3	2	3	4	3	2	1	5	1	2	2	1	1	1	1	2	3	1	1	1	1	1	1	1	1	2	2	3	3	3
228	2	23	8	3	4	3	4	3	9	1	5	4	3	2	1	1	2	2	1	2	1	1	2	1	3	1	2	1	3	1	2	3	1
229	2	29	7	3	2	3	4	3	9	1	5	1	2	1	1	1	2	2	1	1	1	2	1	3	3	1	2	1	2	2	2	1	2
230	1	23	4	3	4	3	4	3	9	5	5	2	2	3	4	1	2	2	1	3	3	1	3	1	3	3	3	3	3	2	4	1	2
231	2	22	5	3	4	3	4	5	9	5	5	2	2	3	1	2	4	2	2	3	2	2	3	1	4	2	2	2	4	3	4	2	3
232	2	23	5	3	4	3	4	5	9	5	5	2	2	3	1	1	2	2	2	3	2	1	2	1	3	3	3	1	2	2	4	2	3
233	1	24	5	3	4	3	4	5	9	5	5	3	2	2	1	2	1	2	1	3	1	1	1	1	4	2	1	1	2	2	4	1	1
234	2	23	5	3	4	3	4	3	9	1	5	1	2	3	1	1	3	2	1	3	2	1	2	1	3	2	2	2	2	2	2	2	2
235	1	24	5	1	4	3	4	3	9	1	5	1	2	2	1	3	2	2	1	2	3	1	1	1	3	1	3	1	1	2	2	2	1
236	2	28	5	3	4	3	4	3	9	5	5	1	2	1	1	1	1	1	1	1	2	1	1	1	2	1	1	1	2	2	2	1	2
237	2	22	5	3	2	3	4	2	9	1	5	1	2	2	2	1	3	2	2	3	3	1	2	1	3	3	2	1	2	1	4	1	3
238	2	23	5	3	4	3	4	3	9	1	5	2	4	2	1	2	2	2	1	3	2	1	1	1	4	2	3	1	3	2	4	2	2
239	2	25	5	3	4	3	4	2	9	1	5	1	3	3	1	1	3	2	1	2	2	2	2	1	3	3	2	2	2	2	2	2	2
240	1	22	4	3	2	3	4	3	1	4	5	2	2	1	2	2	1	2	2	1	1	1	2	1	2	2	2	1	1	3	2	1	1
241	1	25	8	3	4	3	4	3	9	1	5	2	2	3	1	1	4	2	2	4	2	1	2	3	4	3	2	2	2	2	4	3	3
242	2	23	5	3	1	3	4	3	9	1	5	1	3	3	2	3	3	4	2	3	2	1	2	1	4	2	1	1	3	2	2	1	3
243	2	23	5	3	4	3	4	5	9	5	5	2	2	3	1	2	3	2	2	3	2	1	2	1	4	2	2	1	4	1	4	2	3
244	2	22	4	3	1	3	4	3	9	1	5	1	2	3	2	2	3	2	2	4	2	2	2	1	4	2	2	2	2	2	2	2	2
245	2	23	4	3	4	3	4	3	9	5	5	1	2	2	1	1	2	2	1	2	2	1	2	2	2	2	2	2	2	2	2	2	2
246	2	23	5	3	1	3	4	5	9	1	5	1	2	2	1	1	1	1	1	2	2	1	2	1	4	2	2	2	2	2	4	1	1
247	2	29	8	3	4	3	4	3	9	5	5	3	2	1	1	1	2	2	1	2	1	1	1	1	4	1	1	1	1	1	2	1	1
248	2	24	5	3	4	3	4	5	9	1	5	2	2	2	1	2	2	2	2	2	2	2	2	1	3	3	2	1	3	2	4	2	2
249	2	21	4	3	4	3	4	3	9	1	5	1	2	3	2	1	3	2	2	2	2	2	2	1	3	2	2	2	2	2	2	2	2
250	2	27	6	3	1	3	4	3	9	1	5	2	2	2	1	1	2	1	1	2	2	2	2	1	3	2	2	1	1	2	3	3	1
251	2	22	4	3	4	3	4	3	9	1	5	1	2	2	1	1	2	1	1	4	2	1	3	1	3	3	3	2	2	2	2	1	1
252	2	27	6	3	1	3	4	3	9	1	5	2	2	2	1	1	2	1	1	2	2	2	2	1	3	2	2	1	1	2	3	3	1
253	2	23	5	3	4	3	4	5	9	5	5	4	1	3	1	2	4	2	2	3	2	2	2	2	3	2	2	2	1	2	3	2	2
254	2	24	5	1	4	3	4	3	9	1	5	2	2	2	1	1	1	2	2	3	3	3	2	1	3	1	3	1	2	1	4	1	2
255	2	23	5	1	1	3	4	1	9	5	5	4	2	2	2	2	2	2	2	3	2	2	2	1	3	2	2	1	1	1	3	2	1
256	2	23	5	3	4	3	4	3	9	1	5	2	2	2	1	1	1	3	2	2	3	3	1	1	4	2	3	2	2	1	4	2	2
257	2	23	5	3	4	3	4	3	9	1	5	2	2	2	1	1	3	2	1	3	3	2	2	1	4	2	2	2	1	1	4	2	2
258	2	24	5	3	4	3	4	3	9	1	5	4	2	3	1	1	4	1	1	4	2	1	1	2	4	2	2	1	1	2	3	2	1
259	2	23	5	3	4	3	4	3	9	1	5	2	2	3	2	1	4	2	2	3	2	2	2	1	4	2	2	1	1	1	4	3	2
260	2	27	8	3	1	3	4	3	9	1	5	4	2	1	1	1	2	2	1	2	2	2	1	3	2	2	2	1	2	2	2	1	2
261	2	25	8	2	4	3	4	5	9	1	5	4	3	2	1	1	2	1	2	3	1	2	1	2	4	3	2	2	1	2	3	1	2
262	2	23	5	3	2	3	4	3	9	1	5	2	2	2	1	2	3	2	1	3	3	2	1	1	4	2	3	1	1	1	4	2	1
263	2	23	5	3	2	3	4	3	9	1	3	3	3	2	1	1	1	2	2	2	2	2	2	1	2	2	2	1	1	2	2	1	2
264	2	27	6	3	2	3	4	3	9	1	5	2	2	1	1	1	3	2	1	2	1	1	1	1	1	2	1	2	1	2	3	1	1
265	2	23	5	1	4	3	4	5	9	1	5	2	1	2	2	2	3	2	1	3	3	1	2	1	4	2	2	1	2	1	4	2	2
266	2	23	5	1	2	3	4	5	9	1	5	2	2	3	1	2	3	2	1	3	2	2	1	1	3	3	3	2	3	2	4	2	2
267	2	39	8	3	2	3	4	2	1	1	3	3	3	2	1	1	2	2	1	2	1	1	1	1	3	2	2	2	2	2	2	2	2
268	2	24	8	3	4	3	4	3	9	1	5	1	2	2	1	2	3	2	2	2	1	2	1	1	4	2	2	1	1	1	4	3	3
269	2	24	8	3	4	3	4	3	9	1	5	2	2	2	1	2	2	2	2	3	2	1	2	1	2	3	2	1	1	2	4	1	2
270	2	23	5	3	4	3	4	5	9	1	5	2	2	2	1	1	4	2	1	2	2	1	1	1	2	3	2	2	2	2	2	1	3
271	2	23	5	3	3	3	4	3	1	1	5	1	3	3	1	1	4	1	1	3	2	1	2	1	3	1	3	1	1	2	2	1	1
272	2	23	5	3	2	3	4	3	9	1	5	4	2	3	1	1	4	2	1	3	2	2	2	1	4	2	3	2	3	2	4	3	3
273	2	26	6	3	4	3	4	5	9	1	5	4	2	2	2	1	1	2	1	3	1	2	1	3	3	2	2	1	3	1	2	2	1
274	2	23	5	3	3	3	4	2	1	1	5	2	2	2	1	1	1	1	1	2	3	1	1	1	4	2	2	2	1	2	1	1	2
275	1	24	6	3	2	3	4	3	9	1	5	1	2	2	1	1	3	2	2	2	2	2	2	1	3	2	2	1	2	2	3	2	2
276	1	24	5	3	3	3	4	5	9	3	5	4	3	2	2	1	1	1	1	1	1	1	1	3	4	4	1	1	1	1	1	1	1
277	2	23	5	3	4	3	2	3	9	5	5	2	2	2	1	1	4	2	2	2	2	2	2	3	3	2	2	2	3	2	4	2	3
278	2	24	8	3	2	3	4	3	1	3	5	1	3	2	1	1	3	1	2	2	1	2	2	3	3	2	1	1	2	1	2	2	2
279	1	23	8	3	4	3	4	3	9	1	5	4	2	2	2	1	1	2	1	2	2	1	1	3	3	1	2	1	2	1	2	1	1
280	2	23	5	3	4	3	4	5	9	1	5	4	2	2	1	2	1	1	1	2	1	1	1	1	2	1	2	1	1	2	1	1	1
281	2	29	6	3	4	3	4	5	9	5	5	2	1	2	1	2	2	2	2	2	1	1	2	4	3	2	2	2	1	2	3	2	2
282	2	23	8	3	4	3	4	3	9	1	5	1	2	2	1	1	1	1	2	3	2	1	2	3	3	2	2	1	1	1	4	2	1
283	1	25	8	3	4	3	4	5	9	5	5	4	2	2	2	1	1	2	3	3	1	2	2	1	3	2	2	3	3	1	4	1	2
284	1	23	5	3	3	3	4	1	1	1	5	1	1	3	3	2	2	3	2	3	2	1	1	1	3	2	3	2	3	2	4	1	1
285	1	23	5	3	3	3	2	3	9	2	5	2	2	2	3	3	3	2	2	2	2	2	2	1	2	2	2	2	2	2	1	4	1
286	2	23	5	3	4	3	4	5	9	5	5	1	3	3	1	1	2	1	1	3	2	1	2	1	4	2	2	1	3	2	3	3	3
287	1	28	8	3	4	3	4	3	9	1	5	4	2	2	1	1	3	2	1	2	2	2	1	3	4	1	2	1	4	1	4	1	2
288	1	27	6	3	4	3	4	3	9	1	5	3	2	2	1	2	2	2	2	2	2	2	2	1	3	2	2	1	2	2	3	2	2
289	2	22	5	1	4	4	4	3	9	1	5	2	1	2	1	2	3	3	1	2	2	2	2	1	4	2	2	2	2	2	2	2	2
290	2	25	8	3	4	3	4	3	9	1	5	2	2	2	1	1	2	2	1	2	1	1	1	1	3	2	2	1	3	2	1	2	2
291	1	23	3	1	4	3	4	3	9	5	5	2	2	2	1	2	2	2	1	2	2	2	3	3	3	2	2	1	3	3	3	3	2
292	2	22	4	3	4	3	4	3	9	1	5	1	2	3	1	1	3	2	2	4	2	2	2	1	4	3	2	1	2	1	4	1	2
293	2	22	5	3	4	3	4	1	9	4	5	2	2	2	1	1	4	3	1	2	2	2	2	1	4	2	2	1	2	2	4	2	1
294	2	25	6	3	4	3	4	5	9	5	5	2	2	2	1	2	2	2	1	2	2	1	2	1	2	2	2	2	2	2	1	2	2
295	2	22	5	3	4	3	4	5	9	1	5	2	2	2	1	2	2	2	1	3	1	1	2	1	3	2	1	1	3	2	4	2	2
296	1	30	7	4	4	3	4	5	9	4	5	4	2	2	2	2	2	1	2	2	3	2	1	3	3	2	2	1	1	3	1	1	1
297	1	23	5	3	4	3	4	3	9	5	5	2	2	2	2	2	2	2	1	1	2	1	2	1	3	2	2	1	1	2	4	2	2
298	2	25	6	3	4	3	4	3	9	1	5	1	2	2	1	1	2	2	1	2	2	1	2	1	1	2	1	1	2	4	3	1	1
299	2	25	6	3	4	3	4	5	9	1	5	2	2	2	1	2	1	2	2	2	2	1	1	3	4	2	2	1	4	1	4	2	2
300	1	26	6	3	4	3	4	5	9	5	5	2	2	1	1	1	1	1	1	1	2	1	1	3	3	1	1	1	2	3	1	1	1
301	1	25	5	3	4	3	4	5	9	5	5	2	4	4	1	2	2	2	2	2	2	1	2	3	2	3	3	2	2	2	2	2	2
302	2	23	8	3	4	3	4	3	9	1	5	4	3	2	1	1	2	2	1	2	1	1	2	1	3	1	2	1	3	1	2	3	1
303	2	29	7	3	2	3	4	3	9	1	5	1	2	1	1	1	2	2	1	1	1	2	1	3	3	1	2	1	2	2	2	1	2
304	1	23	4	3	4	3	4	3	9	5	5	2	2	3	4	1	2	2	1	3	3	1	3	1	3	3	3	3	3	2	4	1	2
305	1	22	4	3	2	3	4	3	9	1	5	2	3	3	1	2	3	2	2	3	2	2	1	1	3	2	2	1	2	1	4	1	2
306	1	24	4	3	2	3	4	3	9	1	5	2	3	3	1	2	3	2	2	3	2	2	1	1	3	2	2	1	1	1	4	1	2
307	1	26	6	3	3	3	4	3	9	1	5	1	2	2	1	1	3	2	1	2	2	1	1	1	2	2	2	2	2	1	3	2	2
308	2	22	5	3	3	3	4	3	1	1	5	2	3	2	1	1	3	2	1	2	2	1	1	3	4	2	2	1	2	1	4	1	2
309	2	22	4	3	4	3	4	3	9	1	5	1	2	2	1	1	2	1	1	4	2	1	3	1	3	3	3	2	2	2	2	1	1
310	2	23	5	3	4	3	4	5	9	5	5	2	2	3	1	1	3	3	1	3	2	1	3	1	3	3	3	3	1	2	3	3	2
311	2	29	8	3	4	3	4	5	9	1	5	1	2	2	1	1	1	2	2	2	3	1	2	1	4	1	2	1	3	2	4	1	2
312	1	40	8	3	2	3	4	3	9	1	5	2	2	1	1	2	1	2	1	2	2	2	2	1	4	1	2	2	3	2	1	1	1
313	2	24	5	3	2	3	4	3	2	1	5	1	2	2	1	1	1	1	2	3	1	1	1	1	1	1	1	1	2	2	3	3	3
314	2	23	8	3	4	3	4	3	9	1	5	4	3	2	1	1	2	2	1	2	1	1	2	1	3	1	2	1	3	1	2	3	1
315	2	29	7	3	2	3	4	3	9	1	5	1	2	1	1	1	2	2	1	1	1	2	1	3	3	1	2	1	2	2	2	1	2
316	1	23	4	3	4	3	4	3	9	5	5	2	2	3	4	1	2	2	1	3	3	1	3	1	3	3	3	3	3	2	4	1	2
317	1	22	4	3	2	3	4	3	9	1	5	2	3	3	1	2	3	2	2	3	2	2	1	1	3	2	2	1	2	1	4	1	2
318	1	24	4	3	2	3	4	3	9	1	5	2	3	3	1	2	3	2	2	3	2	2	1	1	3	2	2	1	1	1	4	1	2
319	1	22	4	3	2	3	4	3	1	4	5	2	2	1	2	2	1	2	2	1	1	1	2	1	2	2	2	1	1	3	2	1	1
320	1	25	8	3	4	3	4	3	9	1	5	2	2	3	1	1	4	2	2	4	2	1	2	3	4	3	2	2	2	2	4	3	3
321	2	23	5	3	1	3	4	3	9	1	5	1	3	3	2	3	3	4	2	3	2	1	2	1	4	2	1	1	3	2	2	1	3
322	2	23	5	3	4	3	4	5	9	5	5	2	2	3	1	2	3	2	2	3	2	1	2	1	4	2	2	1	4	1	4	2	3
323	2	22	4	3	1	3	4	3	9	1	5	1	2	3	2	2	3	2	2	4	2	2	2	1	4	2	2	2	2	2	2	2	2
324	2	23	4	3	4	3	4	3	9	5	5	1	2	2	1	1	2	2	1	2	2	1	2	2	2	2	2	2	2	2	2	2	2
325	2	23	5	3	1	3	4	5	9	1	5	1	2	2	1	1	1	1	1	2	2	1	2	1	4	2	2	2	2	2	4	1	1
326	2	29	8	3	4	3	4	3	9	5	5	3	2	1	1	1	2	2	1	2	1	1	1	1	4	1	1	1	1	1	2	1	1
327	2	24	5	3	4	3	4	5	9	1	5	2	2	2	1	2	2	2	2	2	2	2	2	1	3	3	2	1	3	2	4	2	2
328	2	21	4	3	4	3	4	3	9	1	5	1	2	3	2	1	3	2	2	2	2	2	2	1	3	2	2	2	2	2	2	2	2
329	2	27	6	3	1	3	4	3	9	1	5	2	2	2	1	1	2	1	1	2	2	2	2	1	3	2	2	1	1	2	3	3	1
330	2	22	4	3	4	3	4	3	9	1	5	1	2	2	1	1	2	1	1	4	2	1	3	1	3	3	3	2	2	2	2	1	1
331	2	27	6	3	1	3	4	3	9	1	5	2	2	2	1	1	2	1	1	2	2	2	2	1	3	2	2	1	1	2	3	3	1
332	2	23	5	3	4	3	4	5	9	5	5	4	1	3	1	2	4	2	2	3	2	2	2	2	3	2	2	2	1	2	3	2	2
333	2	24	5	1	4	3	4	3	9	1	5	2	2	2	1	1	1	2	2	3	3	3	2	1	3	1	3	1	2	1	4	1	2
334	2	23	5	1	1	3	4	1	9	5	5	4	2	2	2	2	2	2	2	3	2	2	2	1	3	2	2	1	1	1	3	2	1
335	2	23	5	3	4	3	4	3	9	1	5	2	2	2	1	1	1	3	2	2	3	3	1	1	4	2	3	2	2	1	4	2	2
336	2	23	5	3	4	3	4	3	9	1	5	2	2	2	1	1	3	2	1	3	3	2	2	1	4	2	2	2	1	1	4	2	2
337	2	24	5	3	4	3	4	3	9	1	5	4	2	3	1	1	4	1	1	4	2	1	1	2	4	2	2	1	1	2	3	2	1
338	2	23	5	3	4	3	4	3	9	1	5	2	2	3	2	1	4	2	2	3	2	2	2	1	4	2	2	1	1	1	4	3	2
339	2	27	8	3	1	3	4	3	9	1	5	4	2	1	1	1	2	2	1	2	2	2	1	3	2	2	2	1	2	2	2	1	2
340	2	25	8	2	4	3	4	5	9	1	5	4	3	2	1	1	2	1	2	3	1	2	1	2	4	3	2	2	1	2	3	1	2
341	2	23	5	3	2	3	4	3	9	1	5	2	2	2	1	2	3	2	1	3	3	2	1	1	4	2	3	1	1	1	4	2	1
342	2	23	5	3	2	3	4	3	9	1	3	3	3	2	1	1	1	2	2	2	2	2	2	1	2	2	2	1	1	2	2	1	2
343	2	27	6	3	2	3	4	3	9	1	5	2	2	1	1	1	3	2	1	2	1	1	1	1	1	2	1	2	1	2	3	1	1
344	2	23	5	1	4	3	4	5	9	1	5	2	1	2	2	2	3	2	1	3	3	1	2	1	4	2	2	1	2	1	4	2	2
345	2	23	5	1	2	3	4	5	9	1	5	2	2	3	1	2	3	2	1	3	2	2	1	1	3	3	3	2	3	2	4	2	2
346	2	39	8	3	2	3	4	2	1	1	3	3	3	2	1	1	2	2	1	2	1	1	1	1	3	2	2	2	2	2	2	2	2
347	2	24	8	3	4	3	4	3	9	1	5	1	2	2	1	2	3	2	2	2	1	2	1	1	4	2	2	1	1	1	4	3	3
348	2	24	8	3	4	3	4	3	9	1	5	2	2	2	1	2	2	2	2	3	2	1	2	1	2	3	2	1	1	2	4	1	2
349	2	23	5	3	4	3	4	5	9	1	5	2	2	2	1	1	4	2	1	2	2	1	1	1	2	3	2	2	2	2	2	1	3
350	2	23	5	3	3	3	4	3	1	1	5	1	3	3	1	1	4	1	1	3	2	1	2	1	3	1	3	1	1	2	2	1	1
351	2	23	5	3	2	3	4	3	9	1	5	4	2	3	1	1	4	2	1	3	2	2	2	1	4	2	3	2	3	2	4	3	3
352	2	26	6	3	4	3	4	5	9	1	5	4	2	2	2	1	1	2	1	3	1	2	1	3	3	2	2	1	3	1	2	2	1
353	2	23	5	3	3	3	4	2	1	1	5	2	2	2	1	1	1	1	1	2	3	1	1	1	4	2	2	2	1	2	1	1	2
354	1	24	6	3	2	3	4	3	9	1	5	1	2	2	1	1	3	2	2	2	2	2	2	1	3	2	2	1	2	2	3	2	2
355	1	24	5	3	3	3	4	5	9	3	5	4	3	2	2	1	1	1	1	1	1	1	1	3	4	4	1	1	1	1	1	1	1
356	2	23	5	3	4	3	2	3	9	5	5	2	2	2	1	1	4	2	2	2	2	2	2	3	3	2	2	2	3	2	4	2	3
357	2	24	8	3	2	3	4	3	1	3	5	1	3	2	1	1	3	1	2	2	1	2	2	3	3	2	1	1	2	1	2	2	2
358	1	23	8	3	4	3	4	3	9	1	5	4	2	2	2	1	1	2	1	2	2	1	1	3	3	1	2	1	2	1	2	1	1
359	2	23	5	3	4	3	4	5	9	1	5	4	2	2	1	2	1	1	1	2	1	1	1	1	2	1	2	1	1	2	1	1	1
360	2	29	6	3	4	3	4	5	9	5	5	2	1	2	1	2	2	2	2	2	1	1	2	4	3	2	2	2	1	2	3	2	2
361	2	23	8	3	4	3	4	3	9	1	5	1	2	2	1	1	1	1	2	3	2	1	2	3	3	2	2	1	1	1	4	2	1
362	1	25	8	3	4	3	4	5	9	5	5	4	2	2	2	1	1	2	3	3	1	2	2	1	3	2	2	3	3	1	4	1	2
363	1	23	5	3	3	3	4	1	1	1	5	1	1	3	3	2	2	3	2	3	2	1	1	1	3	2	3	2	3	2	4	1	1
364	1	23	5	3	3	3	2	3	9	2	5	2	2	2	3	3	3	2	2	2	2	2	2	1	2	2	2	2	2	2	1	4	1
365	2	23	5	3	4	3	4	5	9	5	5	1	3	3	1	1	2	1	1	3	2	1	2	1	4	2	2	1	3	2	3	3	3
366	1	28	8	3	4	3	4	3	9	1	5	4	2	2	1	1	3	2	1	2	2	2	1	3	4	1	2	1	4	1	4	1	2
367	1	27	6	3	4	3	4	3	9	1	5	3	2	2	1	2	2	2	2	2	2	2	2	1	3	2	2	1	2	2	3	2	2
368	2	22	5	1	4	4	4	3	9	1	5	2	1	2	1	2	3	3	1	2	2	2	2	1	4	2	2	2	2	2	2	2	2
369	2	25	8	3	4	3	4	3	9	1	5	2	2	2	1	1	2	2	1	2	1	1	1	1	3	2	2	1	3	2	1	2	2
370	1	23	3	1	4	3	4	3	9	5	5	2	2	2	1	2	2	2	1	2	2	2	3	3	3	2	2	1	3	3	3	3	2
371	2	22	4	3	4	3	4	3	9	1	5	1	2	3	1	1	3	2	2	4	2	2	2	1	4	3	2	1	2	1	4	1	2
372	2	22	5	3	4	3	4	1	9	4	5	2	2	2	1	1	4	3	1	2	2	2	2	1	4	2	2	1	2	2	4	2	1
373	2	25	6	3	4	3	4	5	9	5	5	2	2	2	1	2	2	2	1	2	2	1	2	1	2	2	2	2	2	2	1	2	2
374	2	22	5	3	4	3	4	5	9	1	5	2	2	2	1	2	2	2	1	3	1	1	2	1	3	2	1	1	3	2	4	2	2
375	1	30	7	4	4	3	4	5	9	4	5	4	2	2	2	2	2	1	2	2	3	2	1	3	3	2	2	1	1	3	1	1	1
376	1	23	5	3	4	3	4	3	9	5	5	2	2	2	2	2	2	2	1	1	2	1	2	1	3	2	2	1	1	2	4	2	2
377	2	25	6	3	4	3	4	3	9	1	5	1	2	2	1	1	2	2	1	2	2	1	2	1	1	2	1	1	2	4	3	1	1
378	2	25	6	3	4	3	4	5	9	1	5	2	2	2	1	2	1	2	2	2	2	1	1	3	4	2	2	1	4	1	4	2	2
379	1	26	6	3	4	3	4	5	9	5	5	2	2	1	1	1	1	1	1	1	2	1	1	3	3	1	1	1	2	3	1	1	1
380	1	25	5	3	4	3	4	5	9	5	5	2	4	4	1	2	2	2	2	2	2	1	2	3	2	3	3	2	2	2	2	2	2
381	2	23	8	3	4	3	4	3	9	1	5	4	3	2	1	1	2	2	1	2	1	1	2	1	3	1	2	1	3	1	2	3	1
382	2	29	7	3	2	3	4	3	9	1	5	1	2	1	1	1	2	2	1	1	1	2	1	3	3	1	2	1	2	2	2	1	2
383	1	23	4	3	4	3	4	3	9	5	5	2	2	3	4	1	2	2	1	3	3	1	3	1	3	3	3	3	3	2	4	1	2
384	1	22	4	3	2	3	4	3	9	1	5	2	3	3	1	2	3	2	2	3	2	2	1	1	3	2	2	1	2	1	4	1	2
385	1	24	4	3	2	3	4	3	9	1	5	2	3	3	1	2	3	2	2	3	2	2	1	1	3	2	2	1	1	1	4	1	2
386	1	26	6	3	3	3	4	3	9	1	5	1	2	2	1	1	3	2	1	2	2	1	1	1	2	2	2	2	2	1	3	2	2
387	2	22	5	3	3	3	4	3	1	1	5	2	3	2	1	1	3	2	1	2	2	1	1	3	4	2	2	1	2	1	4	1	2
388	2	22	4	3	4	3	4	3	9	1	5	1	2	2	1	1	2	1	1	4	2	1	3	1	3	3	3	2	2	2	2	1	1
389	2	23	5	3	4	3	4	5	9	5	5	2	2	3	1	1	3	3	1	3	2	1	3	1	3	3	3	3	1	2	3	3	2
390	2	29	8	3	4	3	4	5	9	1	5	1	2	2	1	1	1	2	2	2	3	1	2	1	4	1	2	1	3	2	4	1	2
391	1	40	8	3	2	3	4	3	9	1	5	2	2	1	1	2	1	2	1	2	2	2	2	1	4	1	2	2	3	2	1	1	1
392	2	24	5	3	2	3	4	3	2	1	5	1	2	2	1	1	1	1	2	3	1	1	1	1	1	1	1	1	2	2	3	3	3
393	2	23	8	3	4	3	4	3	9	1	5	4	3	2	1	1	2	2	1	2	1	1	2	1	3	1	2	1	3	1	2	3	1
394	2	29	7	3	2	3	4	3	9	1	5	1	2	1	1	1	2	2	1	1	1	2	1	3	3	1	2	1	2	2	2	1	2
395	1	23	4	3	4	3	4	3	9	5	5	2	2	3	4	1	2	2	1	3	3	1	3	1	3	3	3	3	3	2	4	1	2
396	1	24	5	3	3	3	4	5	9	3	5	4	3	2	2	1	1	1	1	1	1	1	1	3	4	4	1	1	1	1	1	1	1
397	2	23	5	3	4	3	2	3	9	5	5	2	2	2	1	1	4	2	2	2	2	2	2	3	3	2	2	2	3	2	4	2	3
398	2	24	8	3	2	3	4	3	1	3	5	1	3	2	1	1	3	1	2	2	1	2	2	3	3	2	1	1	2	1	2	2	2
399	1	23	8	3	4	3	4	3	9	1	5	4	2	2	2	1	1	2	1	2	2	1	1	3	3	1	2	1	2	1	2	1	1
400	2	23	5	3	4	3	4	5	9	1	5	4	2	2	1	2	1	1	1	2	1	1	1	1	2	1	2	1	1	2	1	1	1
401	2	29	6	3	4	3	4	5	9	5	5	2	1	2	1	2	2	2	2	2	1	1	2	4	3	2	2	2	1	2	3	2	2
402	2	23	8	3	4	3	4	3	9	1	5	1	2	2	1	1	1	1	2	3	2	1	2	3	3	2	2	1	1	1	4	2	1
403	1	25	8	3	4	3	4	5	9	5	5	4	2	2	2	1	1	2	3	3	1	2	2	1	3	2	2	3	3	1	4	1	2
404	1	23	5	3	3	3	4	1	1	1	5	1	1	3	3	2	2	3	2	3	2	1	1	1	3	2	3	2	3	2	4	1	1
405	1	23	5	3	3	3	2	3	9	2	5	2	2	2	3	3	3	2	2	2	2	2	2	1	2	2	2	2	2	2	1	4	1
406	2	23	5	3	4	3	4	5	9	5	5	1	3	3	1	1	2	1	1	3	2	1	2	1	4	2	2	1	3	2	3	3	3
407	1	28	8	3	4	3	4	3	9	1	5	4	2	2	1	1	3	2	1	2	2	2	1	3	4	1	2	1	4	1	4	1	2
408	1	27	6	3	4	3	4	3	9	1	5	3	2	2	1	2	2	2	2	2	2	2	2	1	3	2	2	1	2	2	3	2	2
409	2	22	5	1	4	4	4	3	9	1	5	2	1	2	1	2	3	3	1	2	2	2	2	1	4	2	2	2	2	2	2	2	2
410	2	25	8	3	4	3	4	3	9	1	5	2	2	2	1	1	2	2	1	2	1	1	1	1	3	2	2	1	3	2	1	2	2
411	1	23	3	1	4	3	4	3	9	5	5	2	2	2	1	2	2	2	1	2	2	2	3	3	3	2	2	1	3	3	3	3	2
412	2	22	4	3	4	3	4	3	9	1	5	1	2	3	1	1	3	2	2	4	2	2	2	1	4	3	2	1	2	1	4	1	2
413	2	22	5	3	4	3	4	1	9	4	5	2	2	2	1	1	4	3	1	2	2	2	2	1	4	2	2	1	2	2	4	2	1
414	2	25	6	3	4	3	4	5	9	5	5	2	2	2	1	2	2	2	1	2	2	1	2	1	2	2	2	2	2	2	1	2	2
415	2	22	5	3	4	3	4	5	9	1	5	2	2	2	1	2	2	2	1	3	1	1	2	1	3	2	1	1	3	2	4	2	2
416	1	30	7	4	4	3	4	5	9	4	5	4	2	2	2	2	2	1	2	2	3	2	1	3	3	2	2	1	1	3	1	1	1
417	1	23	5	3	4	3	4	3	9	5	5	2	2	2	2	2	2	2	1	1	2	1	2	1	3	2	2	1	1	2	4	2	2
418	2	25	6	3	4	3	4	3	9	1	5	1	2	2	1	1	2	2	1	2	2	1	2	1	1	2	1	1	2	4	3	1	1
419	2	25	6	3	4	3	4	5	9	1	5	2	2	2	1	2	1	2	2	2	2	1	1	3	4	2	2	1	4	1	4	2	2
420	1	26	6	3	4	3	4	5	9	5	5	2	2	1	1	1	1	1	1	1	2	1	1	3	3	1	1	1	2	3	1	1	1
421	1	25	5	3	4	3	4	5	9	5	5	2	4	4	1	2	2	2	2	2	2	1	2	3	2	3	3	2	2	2	2	2	2
422	2	23	8	3	4	3	4	3	9	1	5	4	3	2	1	1	2	2	1	2	1	1	2	1	3	1	2	1	3	1	2	3	1
